# Supplementary material
Source: PubMed Central journal article supplement (PMC5263106)

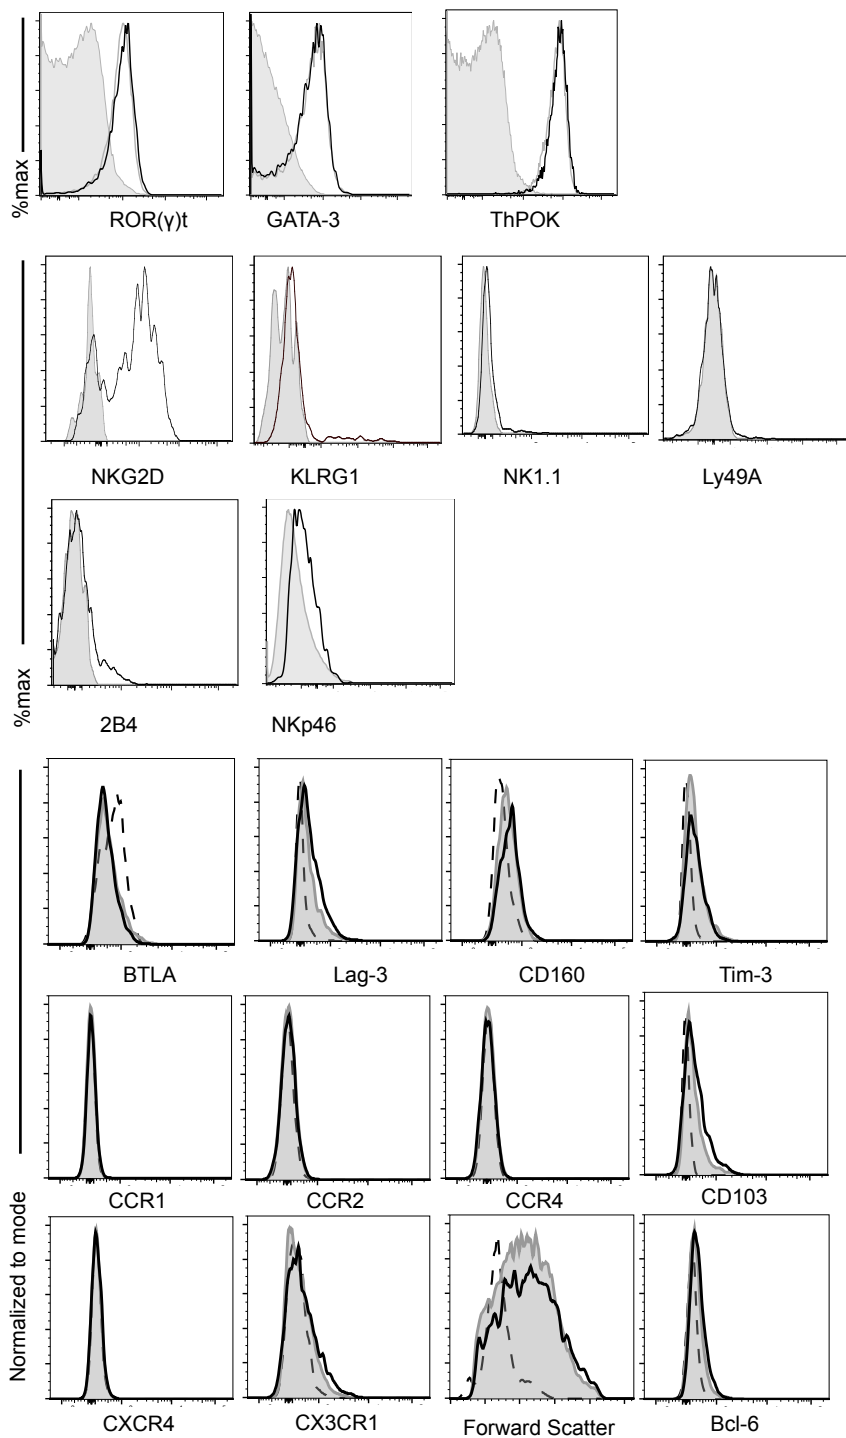

**Supplemental Figure 1: Expression of additional markers on ThCTL.** Representative histograms of transcription factors (top), NK cell-associated markers (middle), inhibitory, chemokine receptors, and other markers (bottom) on NKG2A/C/E<sup>+</sup> or NKG2A/C/E<sup>neg</sup> lung CD4 cells from B6 mice 8 dpi. Top: NKG2A/C/E<sup>+</sup> CD4<sup>+</sup> (dark solid line) or NKG2A/C/E<sup>neg</sup> CD4<sup>+</sup> (solid gray line) and FMO control (shaded gray). Middle: NKG2A/C/E<sup>+</sup> CD4<sup>+</sup> (dark solid line) FMO (shaded gray). Bottom: NKG2A/C/E<sup>+</sup> CD4<sup>+</sup> (dark solid line), NKG2A/C/E<sup>neg</sup> (solid gray line) and CD44<sup>lo</sup> (dashed line).

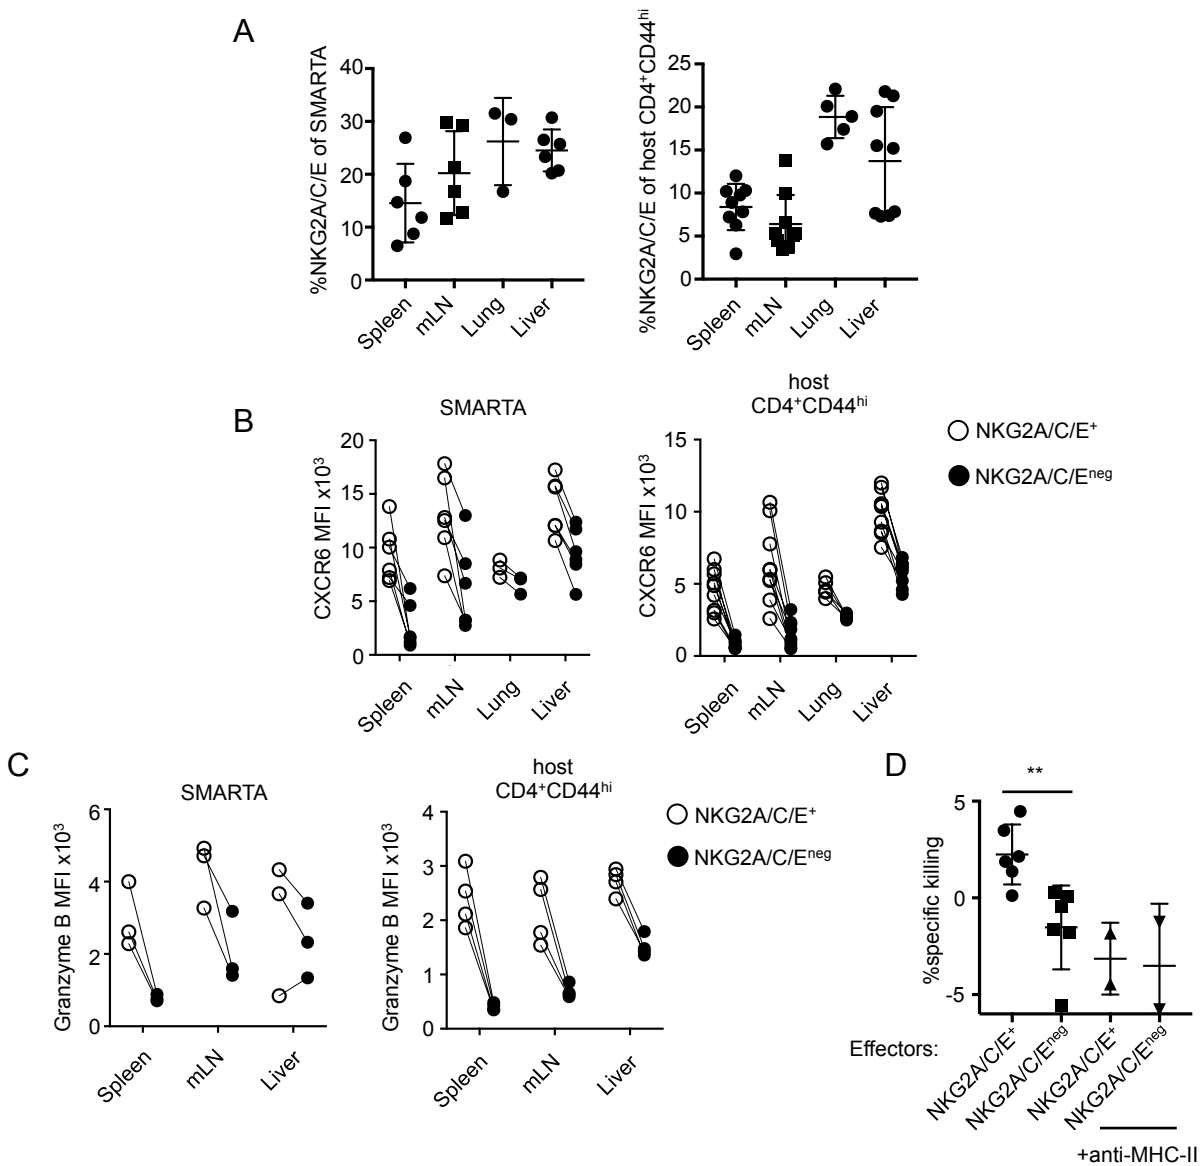

Supplement: NIHMS835411-supplement-1.pdf [file NIHMS835411-supplement-1.pdf]
